# Supplementary material for: Chimeric Plasmodium falciparum parasites expressing Plasmodium vivax circumsporozoite protein fail to produce salivary gland sporozoites
Source: PubMed Central journal article supplement (PMC6085629; doi:10.1186/s12936-018-2431-1), 2018-08-09
Supplement: 12936_2018_2431_MOESM2_ESM.pdf [file 12936_2018_2431_MOESM2_ESM.pdf]

List of primers used in this study

| Primer ID | Gene ID       | Sequence                                             | Enzymes            | Product (bp)                   | Description                        |
|-----------|---------------|------------------------------------------------------|--------------------|--------------------------------|------------------------------------|
| P1        | PF3D7_0304600 | ATAGGTACCAGCACGTGATAAAGTAATTG                        | <i>KpnI</i>        | 1007                           | Forward HR 1 <i>pfcs</i>           |
| P2        | PF3D7_0304600 | ACGGAATTCGCGCGATATCTGTAATTTATAATATACGTGG             | <i>EcoRI/EcoRV</i> |                                | Reverse HR 1 <i>pfcs</i>           |
| P3        | PF3D7_0304600 | CATAAGAATTCAGAACACATCTTAGTTTGAG                      | <i>EcoRI</i>       | 927                            | Forward HR 2 <i>pfcs</i>           |
| P4        | PF3D7_0304600 | AATCGACGCTTCTAGCTTTTAGTATAGGATAG                     | <i>AatII</i>       |                                | Forward HR 2 <i>pfcs</i>           |
| P5        |               | GGGGATATCGCGGCCGCACAAAATCTATATATACACGCATATATTTAAAATG | <i>EcoRV/NotI</i>  | 1188                           | Forward ORF <i>pvcsp-vk210/247</i> |
| P6        |               | AGAATGAATTCATGCGTAATGTTTATTTAATTAATAAATAATGC         | <i>EcoRI</i>       |                                | Reverse ORF <i>pvcsp-vk210/247</i> |
| P7        | PF3D7_0304600 | TAAGTATATAATATTTAAGGCCTCAACAAATAAAAATTTAGAGCTAGAA    |                    |                                | Forward gRNA012                    |
| P8        | PF3D7_0304600 | TTCTAGCTCTAAAACTTTTATTTGTTGAGGCCTTAATATTATATACTTA    |                    |                                | Reverse gRNA012                    |
| P9        |               | CATTTGGATTCTACACATCTTG                               |                    |                                | Sequencing gRNA012                 |
| P10       |               | TAGGAAATAATAAAAAAGCACC                               |                    |                                | Sequencing gRNA012                 |
| P11       | PF3D7_0304600 | TATTATGGAAGTTCGCAACACA                               | <i>BbsI</i>        |                                | Forward gRNA026                    |
| P12       | PF3D7_0304600 | AAACTGTGTTGACGAACCTCCAT                              | <i>BbsI</i>        |                                | Reverse gRNA026                    |
| P13       | PF3D7_0304600 | TATTTAAGGCCTCAACAAATAAAA                             |                    |                                | Forward gRNA012 <i>Pf csp ko</i>   |
| P14       | PF3D7_0304600 | AAACTTTATTTGTTGAGGCCTTA                              |                    |                                | Reverse gRNA012 <i>Pf csp ko</i>   |
| P15       | PF3D7_0304600 | GCTTATAGTCATATACCTAATACG                             |                    | 3676,3728 ( <i>Pf-Pvcsp</i> ), | Forward long range PCR             |
| P16       | PF3D7_0304600 | GAACACCGTATGATTATATGAC                               |                    | 3662 (WT)                      | Reverse long range PCR             |
| P17       |               | GATGGAAATAACGAAGACAACGAG                             |                    | 650                            | Forward <i>Pf csp</i> orf          |
| P18       |               | CATCTACATTTGCGTTTGGGTCA                              |                    |                                | Reverse <i>Pf csp</i> orf          |
| P19       |               | CCAATTATTGCTGATTATACAAATG                            |                    | With P15 1867                  | Reverse 5' integration             |
| P20       |               | AAAGGTACCTAAAAGAAATATGAGAAC                          |                    | 711                            | Forward mCherry                    |
| P21       |               | AAAAAGCTTTTTCGCCACAGGAGAAAC                          |                    |                                | Reverse mCherry                    |
| P22       | PF3D7_0405300 | AACGCTAGCTTCCGGATCGCTGCTTTAC                         |                    | 5400                           | Forward Sequesterin                |
| P23       | PF3D7_0405300 | AGCCGCGGCATGGAGAAGGGTTCTATTTTATCG                    |                    |                                | Reverse Sequesterin                |
| P24       |               | CGCGTAATACGACTCACTATAGGGC                            |                    |                                | LR-PCR sequencing                  |
| P25       |               | CAGTGTGATGGATATCTGCAG                                |                    |                                | LR-PCR sequencing                  |
| P26       |               | CATGCAGATATAAAAAGGTAGAAG                             |                    |                                | LR-PCR sequencing                  |
| P27       |               | AGCAGAACCTAAAAATCCAAG                                |                    |                                | LR-PCR sequencing                  |
| P28       |               | CATTTCCACAGCTGCTTG                                   |                    |                                | LR-PCR sequencing                  |
| P29       |               | CCGGGGTACCAGTTGTGTAACATAAATGTTTCTC                   |                    |                                | LR-PCR sequencing                  |
| P30       |               | CATGTGGTGTGGAGTTAGAG                                 |                    |                                | LR-PCR sequencing                  |
| P31       |               | TTTATGCTTCCGGCTCGTATG                                |                    |                                | LR-PCR sequencing                  |
| P32       |               | ggggatatcgcggccgcACAAAATCTATATATACACGCATATATTTAAAATG |                    |                                | LR-PCR sequencing                  |
