# Supplementary material for: Chimeric Plasmodium falciparum parasites expressing Plasmodium vivax circumsporozoite protein fail to produce salivary gland sporozoites
Source: PubMed Central journal article supplement (PMC6085629; doi:10.1186/s12936-018-2431-1), 2018-08-09

*Pf-Pvcsp*  
(vk210)

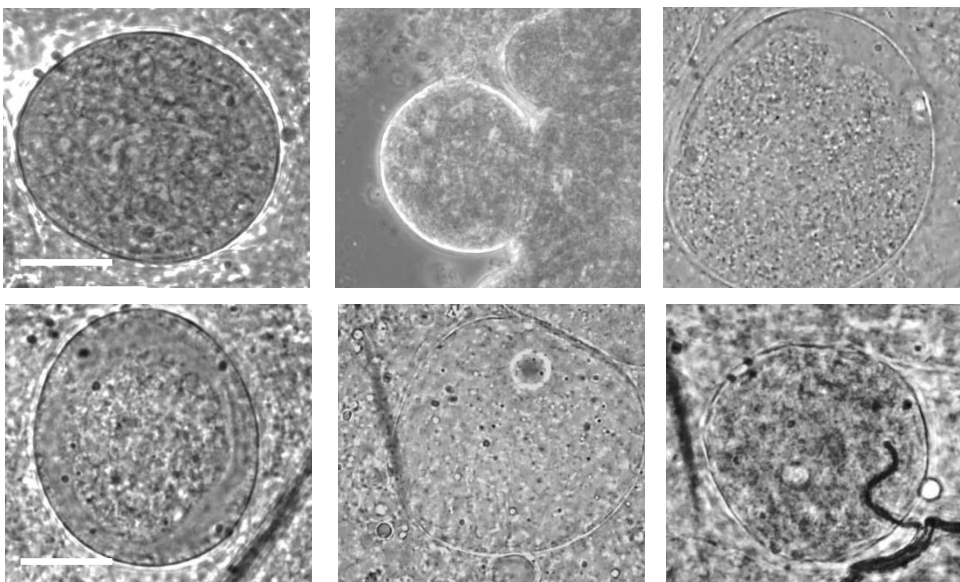

*Pf-Pvcsp*  
(vk247)

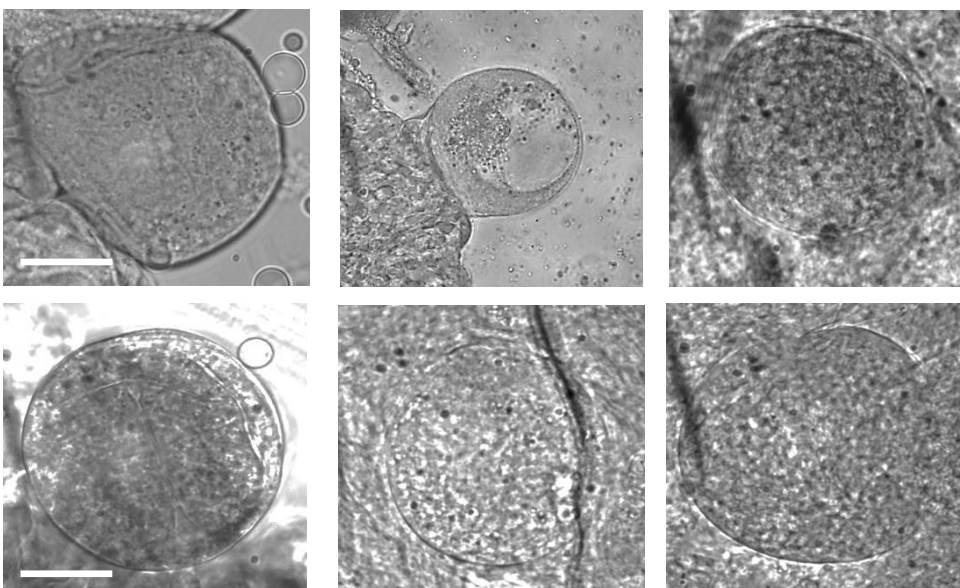

*pf* $\Delta$ CSP

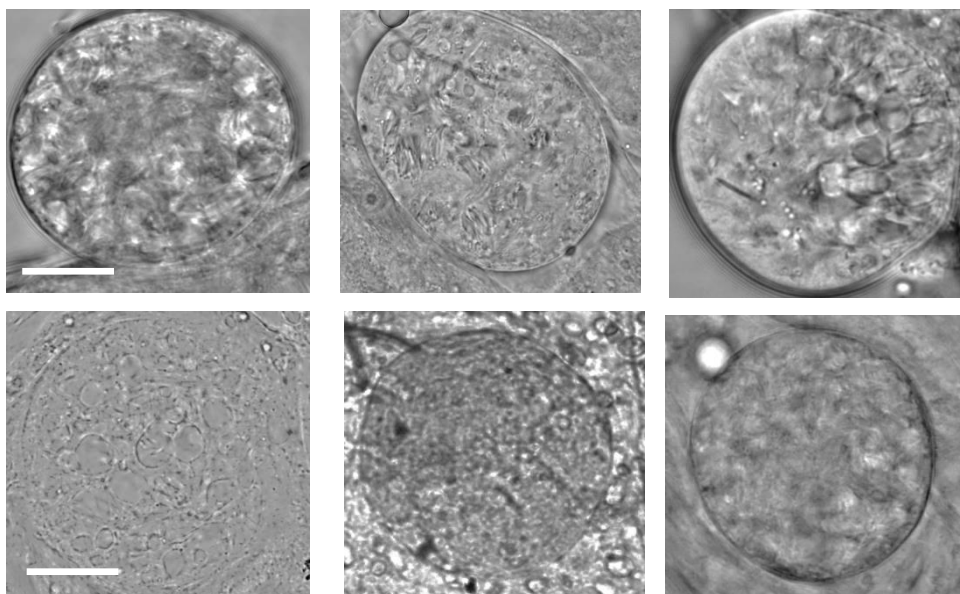

Supplement: 12936_2018_2431_MOESM5_ESM.pdf [file 12936_2018_2431_MOESM5_ESM.pdf]
