# Supplementary material for: Chimeric Plasmodium falciparum parasites expressing Plasmodium vivax circumsporozoite protein fail to produce salivary gland sporozoites
Source: PubMed Central journal article supplement (PMC6085629; doi:10.1186/s12936-018-2431-1), 2018-08-09

**A**

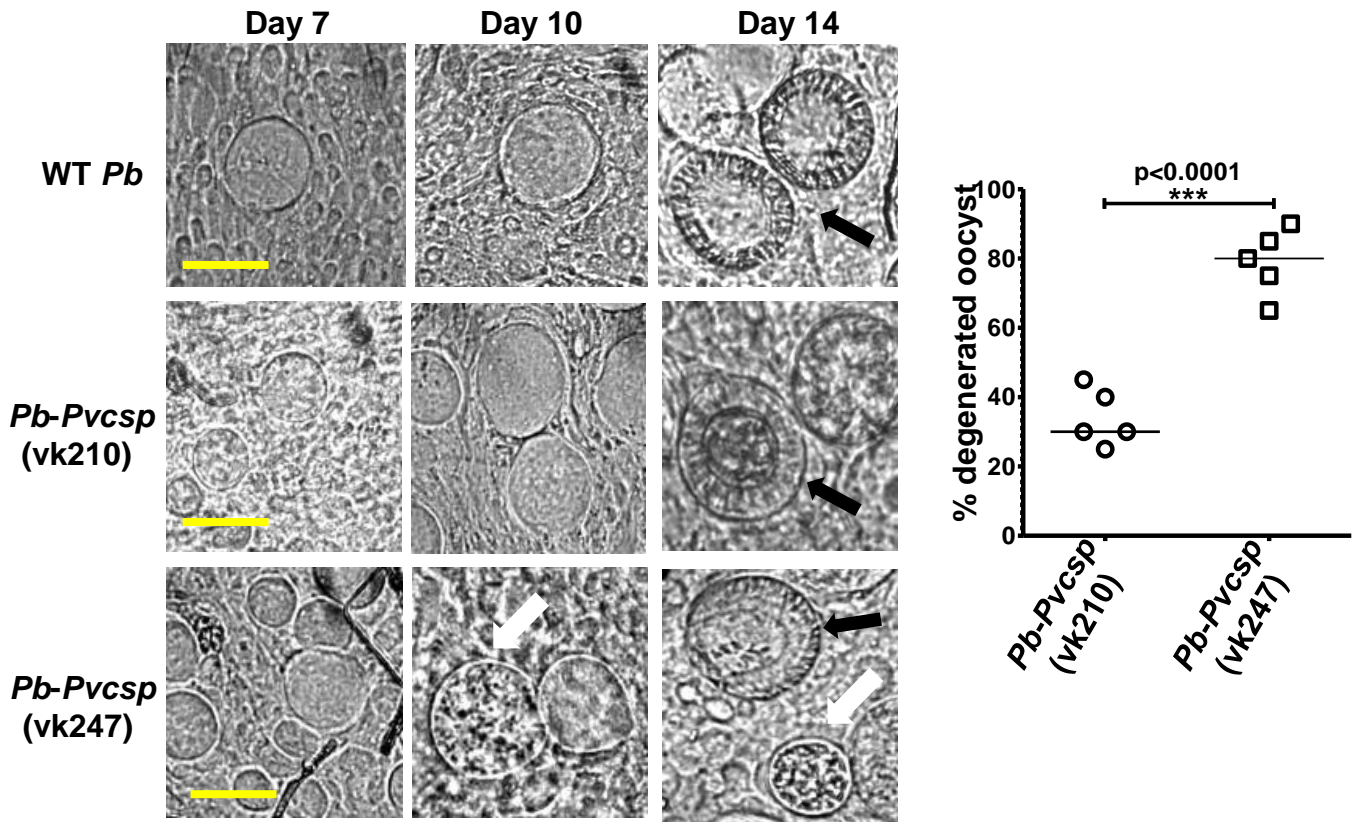

| Parasite line           | Oocyst no.<br>(mean ± D) | Sporozoite no.<br>(mean ± SD) | Significant different from WT<br>(Student t-test) |
|-------------------------|--------------------------|-------------------------------|---------------------------------------------------|
| <i>WT Pb</i>            | 116 ± 22                 | 22,800 ± 3453                 | NA                                                |
| <i>Pb-Pvcsp</i> (vk210) | 112 ± 37                 | 18,700 ± 3755                 | $p = 0.11$ (NS)                                   |
| <i>Pb-Pvcsp</i> (vk247) | 101 ± 28                 | 4,200 ± 1549                  | $p < 0.0001$ (****)                               |

**B**

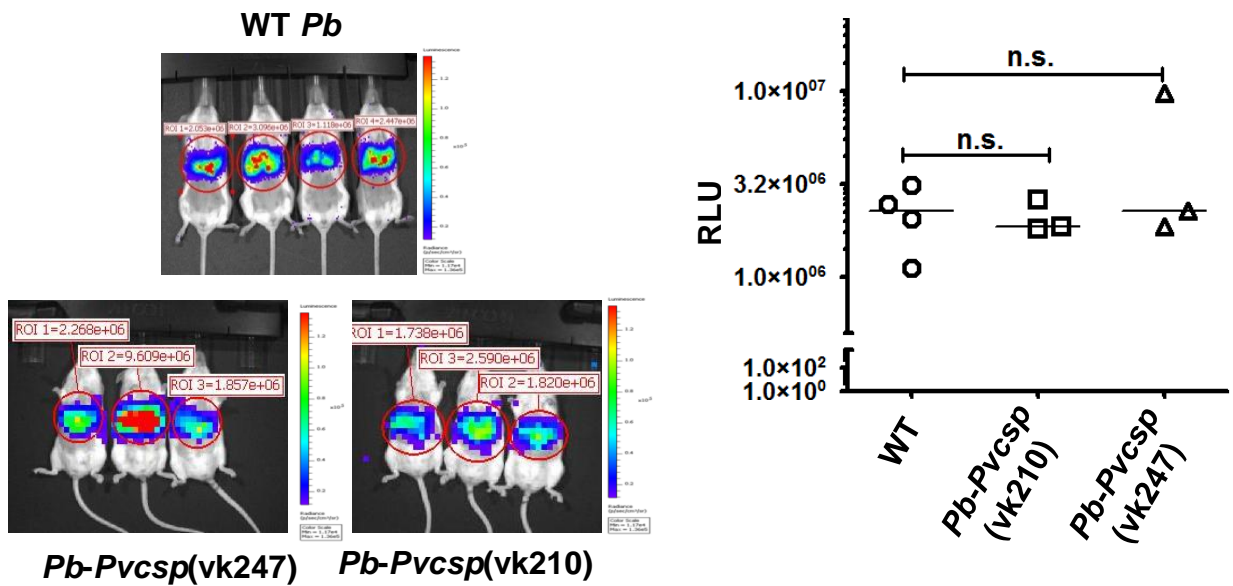

Supplement: 12936_2018_2431_MOESM8_ESM.pdf [file 12936_2018_2431_MOESM8_ESM.pdf]
